# Supplementary material for: Mitigating the Effects of Xuebijing Injection on Hematopoietic Cell Injury Induced by Total Body Irradiation with γ rays by Decreasing Reactive Oxygen Species Levels
Source: MDPI journal article supplement (doi:10.3390/ijms150610541), 2014-06-12

## Supplementary Information

**Table S1.** The viability ( $\text{RLU} \times 10^3$ ) of BMMNCs 18 h after exposure to radiation.

| XBJ ( $\mu\text{L/mL}$ ) | 0 Gy            | 1 Gy               | 4 Gy               |
|--------------------------|-----------------|--------------------|--------------------|
| 0                        | $77 \pm 4$      | $57 \pm 1$         | $41 \pm 1$         |
| 1                        | $89 \pm 5^{**}$ | $61 \pm 1^{**,\#}$ | $47 \pm 3^{*,\#}$  |
| 5                        | $88 \pm 2^*$    | $57 \pm 2^{##}$    | $42 \pm 2^{##}$    |
| 10                       | $79 \pm 2$      | $50 \pm 3^{##}$    | $38 \pm 2^{##}$    |
| 25                       | $64 \pm 2^*$    | $40 \pm 2^{**,\#}$ | $33 \pm 1^{**,\#}$ |
| 50                       | $37 \pm 2^{**}$ | $26 \pm 1^{##}$    | $23 \pm 1^{**,\#}$ |
| 100                      | $15 \pm 1^{**}$ | $14 \pm 0^{**,\#}$ | $12 \pm 0^{**,\#}$ |
| 200                      | $4 \pm 0^{**}$  | $3 \pm 0^{**,\#}$  | $3 \pm 0^{**,\#}$  |

Bone marrow mononucleated cells were exposed to 0, 1 and 4 Gy of radiation after treatment with XBJ for 0.5 h. The viability of the cells was determined at 6 h after radiation exposure. The data are expressed as the means  $\pm$  SEM ( $n = 4$  for each group). \*  $p < 0.05$ , \*\*  $p < 0.01$  vs. control group; #  $p < 0.05$ , ##  $p < 0.01$  vs. the IR alone group.

**Table S2.** The ROS levels of BMMNCs 6 h after exposure to radiation.

| XBJ ( $\mu\text{L/mL}$ ) | 0 Gy               | 1 Gy                  | 4 Gy                   |
|--------------------------|--------------------|-----------------------|------------------------|
| 0                        | $3429 \pm 44$      | $3494 \pm 104$        | $3564 \pm 56$          |
| 1                        | $3584 \pm 75$      | $3488 \pm 116$        | $3249 \pm 111^*$       |
| 5                        | $3232 \pm 41^*$    | $3842 \pm 157^{*,\#}$ | $4291 \pm 135^{**,\#}$ |
| 10                       | $3142 \pm 83^*$    | $3330 \pm 129$        | $3518 \pm 12^{\#}$     |
| 25                       | $2711 \pm 24^{**}$ | $2927 \pm 51^{**,\#}$ | $3346 \pm 79^{*,\#}$   |

Bone marrow mononucleated cells were exposed to 0, 1 and 4 Gy irradiation after treated with XBJ for 0.5 h. Then, the ROS levels of cells were detected by flowcytometry at 6 h after irradiation exposure. The data were expressed as mean  $\pm$  SEM ( $n = 3$  for each group). \*  $p < 0.05$ , \*\*  $p < 0.01$  vs. the control group; #  $p < 0.05$ , ##  $p < 0.01$  vs. the IR alone group.

**Figure S1.** Representative graph for apoptosis analysis. Mice were treated with i.p. injection of the vehicle or XBJ after exposure to 2 Gy TBI, as described in the Experimental Section. BMMNCs were collected from the mice after euthanization nine days after 2 Gy TBI and incubated with FITC-Annexin V and 7-AAD, as per the manufactures instructions. Then, the BMMNCs were detected by flowcytometry and analyzed by the requisite software. (A) Apoptosis of control cells; (B) apoptosis of |IR cells.

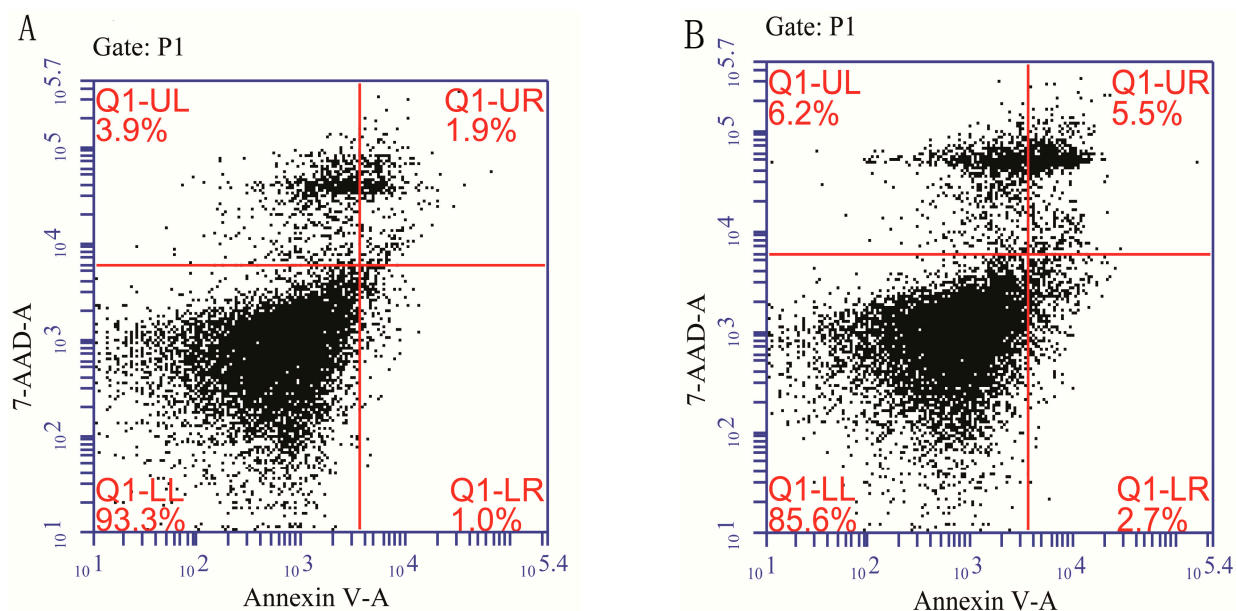

**Figure S2.** Representative ROS measurement. Mice were treated with i.p. injection of the vehicle or XBJ after exposure to 2 Gy TBI, as described in the Experimental Section. BMMNCs were collected from the mice after euthanization nine days after 2 Gy TBI and incubated antibodies, such as biotin-lineage (CD5, B220, Ter-119, CD11b, Gr-1), APC-c-kit, PE-cy7-Sca-1 and streptavidin-APC-cy7, as per the manufactures' instructions. Then, the cells were detected by flowcytometry and analyzed by the requisite software. (A) Bone marrow mononucleated cells (gated); (B) adhesion cells removal; (C) lineage negative cells gated; (D) HSC and HPC gated; (E) representative HSC ROS detection; (F) representative HPC ROS detection.

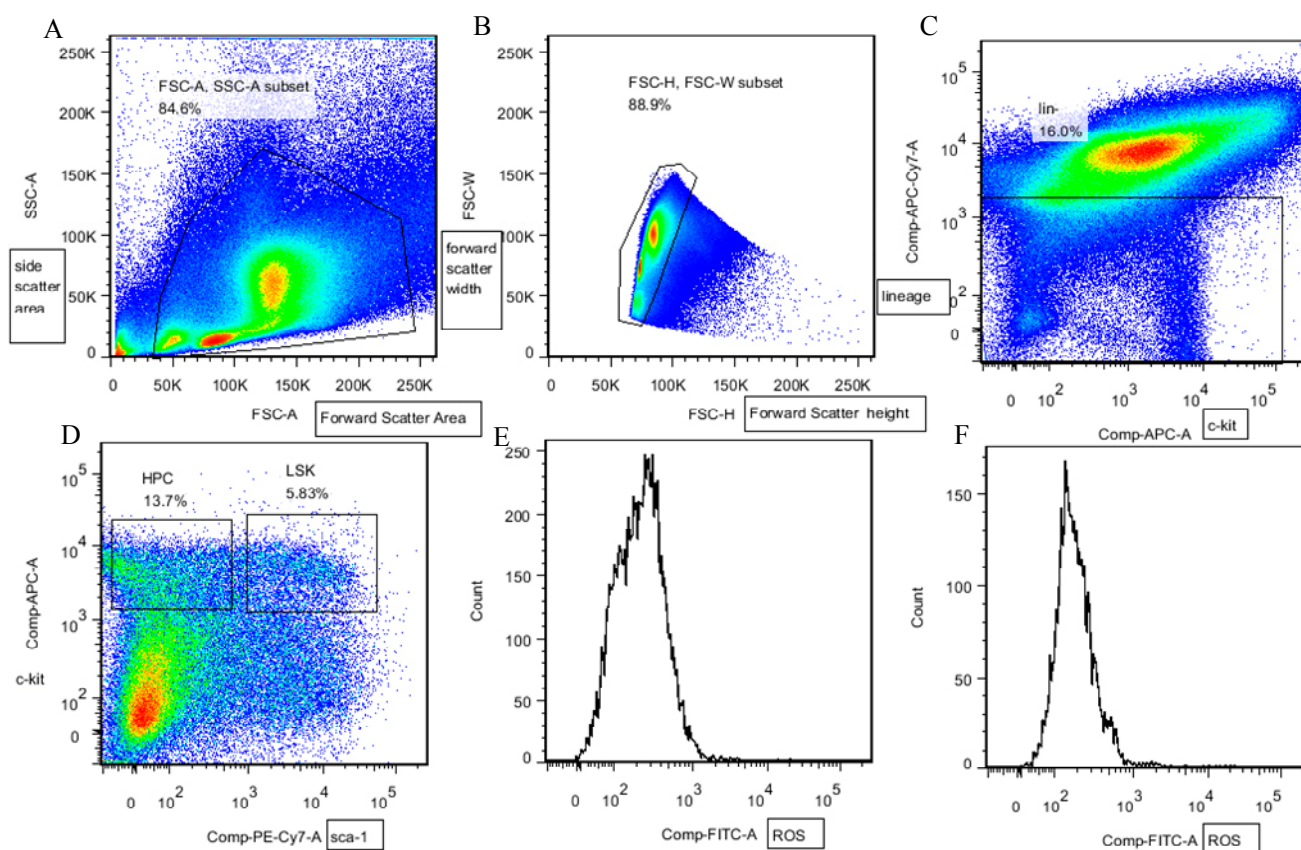

Supplement: s1 [file s1]
